# Supplementary material
Source: PubMed Central journal article supplement (PMC3265219)
Supplement: supp_45.3.480_Cheng_ODS.pdf [file supp_45.3.480_Cheng_ODS.pdf]

## Pharmacologic Activation of the Innate Immune System to Prevent Respiratory Viral Infections

Guanjun Cheng<sup>\*1</sup>, Liang-Chuan S. Wang<sup>1</sup>, Zvi G. Fridlender<sup>1</sup>, Guang-Shing Cheng<sup>2</sup>, Bei Chen<sup>3</sup>, Nilam S. Mangalmurti<sup>1</sup>, Vassiliki Saloura<sup>1</sup>, Zaifang Yu<sup>1</sup>, Veena Kapoor<sup>1</sup>, Krystyna Mozdzanowska<sup>2</sup>, Edmund Moon<sup>1</sup>, Jing Sun<sup>1</sup>, James L. Kreinder<sup>4</sup>, Noam A. Cohen<sup>3</sup>, Andrew J. Caton<sup>2</sup>, Jan Erikson<sup>2</sup>, and Steven M. Albelda<sup>1</sup>

From <sup>1</sup>the Thoracic Oncology Research Laboratory, 1016B ARC, University of Pennsylvania, 3615 Civic Center Boulevard, Philadelphia, PA 19104-4318, <sup>2</sup>The Wistar Institute, Philadelphia, Pennsylvania, PA 19104, <sup>3</sup>Department of Otorhinolaryngology-Head and Neck Surgery, University of Pennsylvania, Philadelphia, Pennsylvania 19104, USA, <sup>4</sup>Department of Pediatric, Children's Hospital of Philadelphia, 1016D ARC, University of Pennsylvania, 3615 Civic Center Boulevard, Philadelphia, PA 19104.

### Running title: DMXAA Prevents Influenza-Induced Pneumonia

This work was funded by NCI PO1 CA 66726, 5-T32 HL07748 (L-C SW and G-S C)

\*To whom correspondence should be addressed: Guanjun Cheng, Thoracic Oncology Research Laboratory, 1016B ARC, University of Pennsylvania, 3615 Civic Center Boulevard, Philadelphia, PA 19104-4318. Phone: 215-573-2593; Fax: 215-573-4469; E-mail: [guanjun@mail.med.upenn.edu](mailto:guanjun@mail.med.upenn.edu)

### ONLINE DATA SUPPLEMENT

#### Supplemental Methods

**Cell culture** Normal human bronchial/tracheal epithelial cells (NHBE) were purchased from Lonza/Clonetics (Walkersville, MD) and grown in bronchial epithelial complete growth medium BEGM BulletKit (Lonza/Clonetics). NHBE cells were plated on tissue culture-treated polyester microporous inserts (0.4  $\mu$ m pore size, Transwell Clear, Costar, Cambridge, MA). Medium was applied both apically and basally until cells reached confluence, the air-liquid interface was created by removing the apical medium and only feeding the cultures from the basal compartment. The culture medium was changed on day one and every other day thereafter. BEAS-2B human bronchial epithelial cells were isolated from normal human bronchial epithelium infected with a adenovirus 12-SV40 virus hybrid (Ad12SV40) and cloned (ATCC, Manassas,

VA). BEAS-2B cells were cultured in 25-cm<sup>2</sup> tissue culture flasks, precoated with a mixture of 0.01 mg/ml fibronectin, 0.03 mg/ml bovine collagen type I and 0.01 mg/ml bovine serum albumin (BSA) dissolved in base medium for this line, and maintained in ATCC complete growth medium BEGM BulletKit. All cell lines were maintained at 37°C in an atmosphere containing 5% CO<sub>2</sub> and were regularly tested and maintained negative for Mycoplasma spp.

**RNA isolation and real time, reverse transcription-PCR.** Quantitation of mRNA levels was done as previously described (12, S4). Total RNA was isolated from cells with RNeasy Mini Kit (Qiagen, Valencia, CA). Three micrograms of RNA from each condition was reverse transcribed

using 2 µg random primers (Invitrogen, Carlsbad, CA), 10 mmol/L deoxynucleotide triphosphates (Clontech, Palo Alto, CA), and 1 unit SuperScript III reverse transcriptase in 1x First-Strand Buffer and 10 mmol/L DTT (Clontech) for 60 minutes at 50°C. Equal amounts of cDNA from each condition were pooled. Primers were obtained from the literature or designed using standard protocols. Semi-quantitative analysis of gene expression was done using an Applied Biosystems StepOne Real-Time PCR System following the manufacturer's protocol for Fast SYBR Green Master Mix. cDNA concentrations from each pool were normalized using GAPDH as a control gene. Relative levels of expression of H1N1 influenza A virus NP RNA (fold change versus saline control) were determined. Each sample was run in triplicate. PCR products were electrophoresed in a 1.5% agarose gel containing ethidium bromide.

**Processing and analysis of bronchoalveolar lavage (BAL) fluid and plasma.** C57/B6 mice were administered PBS, DMXAA (23mg/kg) or LPS (150ng/kg) intranasally. Mice were euthanized with intraperitoneal injection of ketamine (80mg/kg)/xylazine (10mg/kg). Blood samples were drawn by intracardiac puncture using heparinized 1ml syringes and were immediately centrifuged at 2,400 rpm for 5 minutes at room temperature. Plasma was obtained and frozen in 200ul aliquot at -80°C. The thoracic cavity was opened. The lung was lavaged with 0.6ml of 0.9% NaCl/0.6mM EDTA first, followed by instilled three separate aliquots of 0.5ml of 0.9% NaCl/0.6mM EDTA, total BAL volume 2.1ml of that 90% consistently recovered. The total cells of recovery BAL fluid (BALF) were monitored using a hemacytometer. Cytospins of BALF were prepared as follows. The remaining BAL fluid was centrifuged at 1,500

rpm for 5min at 4°C. Aliquots of the supernatant were stored at -80°C (S1-2).

**Cytospins of BALF.** Cytospins of BALF from mice collected after PBS, DMXAA or LPS exposure were processed using a Cytospin 3 (Shandon, Pittsburgh, PA). 50 ul BALF was centrifuged at 300 rpm for 3min at room temperature with a cytocentrifuge. The slides were quickly differential stained by methanol fixed, eosin stained and methylene blue stained with Hemacolor (Harleco, Gibbstown, NJ) according to the instructions of the manufacturer. Differential cell counts from cytospins were performed with a light microscope. At least 200 cells were counted in random fields using standard morphological criteria in a blinded fashion by two independent investigators. Cell counts were expressed as percentages of total cells (S1-3).

**Cytokine/chemokine levels of BALF and plasma.** The amount of IFNβ, CXCL1/KC, CXCL2/MIP2, IP10/CXCL10, IL-6 and MCP1/CCL2 in BAL fluid and plasma was quantified using enzyme-linked immunosorbent assay (ELISA) kits to detect murine IFNβ (VeriKine Mouse IFN Beta ELISA Kit, PBL Biomedical Laboratories), CXCL1/KC (DuoSet Mouse CXCL1/KC, R&D Systems, Inc, Minneapolis, MN), CXCL2/MIP2 (DuoSet Mouse CXCL2/MIP2, R&D Systems, Inc, Minneapolis, MN), IP10 (DuoSet Mouse CXCL10/IP10/CRG-2, R&D Systems, Inc, Minneapolis, MN), IL-6 (BD OptEIA Mouse IL-6 ELISA Set, BD Biosciences Pharmingen, San Diego, CA) and MCP1/CCL2 (BD OptEIA Mouse MCP1 ELISA Set, BD Biosciences Pharmingen, San Diego, CA) according to the instructions of the manufacturers.

**Supplemental Results**  
**DMXAA inhibits replication of H1N1 influenza A in mouse respiratory epithelial**

**cells.** To assess the inhibitive effect of DMXAA on viral replication of H1N1 influenza A virus in respiratory epithelial cells, mouse C10 bronchial epithelial cells were pre-treated with DMXAA (100ug/ml) for 2 hours or were given DMXAA at the same time, and then exposed to H1N1 influenza A virus (1 MOI) for 48 hours. The mRNA expression profiles were evaluated using real time RT-PCR. H1N1 influenza A nucleoprotein (NP) RNA levels were significantly up-regulated by 83.5 folds at 48 hours versus 0 hour post-infection of 1MOI H1N1 influenza A virus (Fig. S1A) in C10 bronchial epithelial cells ( $p < 0.01$ ). When the data is plotted as the cycle number where mRNA was detected, virus infection for 48 hours shows very high enrichment for NP RNA levels (21.9 cycles), with barely detectable at 0 hour post-infection (27 cycles for NP).

H1N1 influenza A virus replicates in mouse C10 bronchial epithelial cells. DMXAA, compared

to virus alone ( $p < 0.01$ ) were significantly reduced H1N1 influenza A NP RNA levels, suggesting

that DMXAA inhibits H1N1 influenza A virus replication in (pulmonary mouse respiratory epithelial cells (Fig. S1B)).

**DMXAA does not induce strong inflammation.** To rule out the possibility that DMXAA alone

induces strong inflammation in the lung, mice were administered DMXAA intranasally and the

BAL assay was performed at 6 hours and 24 hours post-administration. The total cells and infiltrating neutrophils in BALF were counted using a hemacytometer. Neutrophils were significantly elevated by positive control LPS intranasally ( $p < 0.01$ ), but not DMXAA (Fig. S2). More than 90% of BAL cell differentials from mice except for LPS group used in

experiments were macrophages. The results indicate that at the dose of 23mg/kg, DMXAA did

not significantly induce neutrophil inflammatory cells for 6 to 24 hours. The concentrations of

proinflammatory cytokines/chemokines IFN $\beta$ , CXCL1/KC, CXCL2/MIP2, IP10/CXCL10, IL-6

and MCP1/CCL2 in BALF and plasma were evaluated by ELISA. IFN $\beta$  levels of BALF and

plasma were undetectable in all groups (data not shown). There were no significant differences

between DMXAA and control groups in KC, MIP2, IP10, MCP1 and IL6 levels of BALF, and

no significant differences between DMXAA and control groups in IP10 levels of plasma. There

was a trend for increased level of IL6 in BALF in the DMXAA 24h treated group, and MIP2 in

plasma in the DMXAA 6h treated group versus control (Table S1). Marked and significant

elevation ( $p < 0.05$ ) was found in MCP1 in the DMXAA 6h treated group, and KC, MIP2, MCP1

and IL6 in the DMXAA 24h treated group versus control in plasma (Table S1). DMXAA has less effects on cytokines/chemokines levels in BALF than in plasma circulating levels. Taken together, The data demonstrate that DMXAA has no ability to induce strong inflammation effects, including neutrophils infiltration and proinflammatory cytokines/chemokines release in the lung.

**Effects of DMXAA on human epithelial cells.** DMXAA was able to activate the IFN $\beta$  signaling pathway in normal human bronchial epithelial cells and to a much lower extent in BEAS-2B cells. Effect of DMXAA was tested in both NHBE and BEAS-2B cells.

Cells were exposed to DMXAA and IFN $\beta$  mRNA expression was measured using real time RT-PCR, PKR protein levels were detected by immunoblotting. Significant increases in the expression of IFN $\beta$  mRNA at 6h after DMXAA challenge was detected in both cell lines (Fig. S3A). Examination of

PKR expression from BEAS-2B cells revealed that DMXAA elevated PKR levels, PF1M cells are normal human mesothelial cells as a positive control (Fig. S3B). It thus appears DMXAA can also activate IFN $\beta$  signaling pathway in normal human bronchial/tracheal epithelial cells.

### Supplemental References

- S1. Albelda SM, Lau KC, Chien P, Huang ZY, Arguiris E, Bohen A, Sun J, Billet JA, Christofidou-Solomidou M, Indik ZK, Schreiber AD. Role for platelet-endothelial cell adhesion molecule-1 in macrophage Fc $\gamma$  receptor function. *Am J Respir Cell Mol Biol.* 2004 Aug;31(2):246-55.
- S2. Michelle A. Carey, J. Alyce Bradbury, Yvette D. Reboloso, Joan P. Graves, Darryl C. Zeldin, Dori R. Germolec. Pharmacologic Inhibition of COX-1 and COX-2 in Influenza A Viral Infection in Mice. *PLoS One.* 2010 Jul 15;5(7):e11610.
- S3. Babusyte A, Stravinskaite K, Jeroch J, Lötval J, Sakalauskas R, Sitkauskienė B. Patterns of airway inflammation and MMP-12 expression in smokers and ex-smokers with COPD. *Respir Res.* 2007 Nov 14;8:81.
- S4. Hashem AM, Flaman AS, Farnsworth A, Brown EG, Van Domselaar G, He R, Li X. Aurintricarboxylic acid is a potent inhibitor of influenza A and B virus neuraminidases. *PloS One.* 2009 Dec 17;4(12):e8350.

### Supplementary Figure Legends

**Figure S1.** DMXAA reduces H1N1 influenza A NP RNA levels. A. C10 mouse respiratory epithelial cells were infected with H1N1 influenza A virus for 48 hours. The results are presented as mean  $\pm$  SEM (\* $p$ <0.01, 0 h versus 48 h of virus post-infection). B. C10 mouse respiratory epithelial cells were pretreated with DMXAA for 2 hours or treated with DMXAA at the same time, and then were infected with H1N1 influenza A viruses. Total RNA was isolated and the relative H1N1 influenza A NP RNA levels were measured by real time RT-PCR post-infection. The results are presented as mean  $\pm$  SEM (\* $p$ <0.01, virus alone group versus DMXAA plus virus groups).

**Figure S2.** Neutrophils in BAL after DMXAA intranasal administration. C57/B6 mice (3 per group) given DMXAA via the intranasal route and sacrificed at various time points. The percentage of neutrophils in BALF was counted using a hemacytometer (\* $p$ <0.01, CTR versus LPS groups).

**Figure S3.** DMXAA induces IFN $\beta$  and PKR in human bronchial epithelial cells. (A). NHBE and BEAS-2B cells were incubated with or without DMXAA for 6 hours. The total RNA was isolated and the relative IFN $\beta$  mRNA levels were measured by real time RT-PCR. The results are presented as mean  $\pm$  SEM (\*p<0.01, CTR vs DMXAA). (B). BEAS-2B cells were incubated with DMXAA 100ug/ml as indicated time points, lysed and PKR protein levels were analyzed by immunoblot using an anti-OAS1 antibody. Expression levels of  $\beta$ -actin show equal loading of the lanes.

**Table S1.** Cytokine/chemokine levels in BAL and plasma after DMXAA intranasal administration. C57/B6 mice (3 per group) given DMXAA via the intranasal route and sacrificed at various time points. Induction of CXCL1/KC, CXCL2/MIP2, IP10/CXCL10, IL-6 and MCP1/CCL2 in BAL fluid and plasma was determined from BAL and plasma by ELISA. The results are presented as mean  $\pm$  SEM (\*p<0.01, CTR vs DMXAA groups).
