# Supplementary material
Source: PubMed Central journal article supplement (PMC3265219)
Supplement: supp_45.3.480_Cheng_ODS_figs_and_table.pdf [file supp_45.3.480_Cheng_ODS_figs_and_table.pdf]

# Figure S1

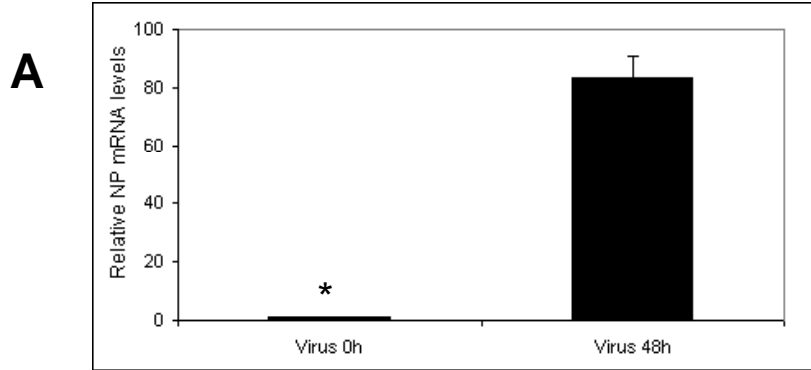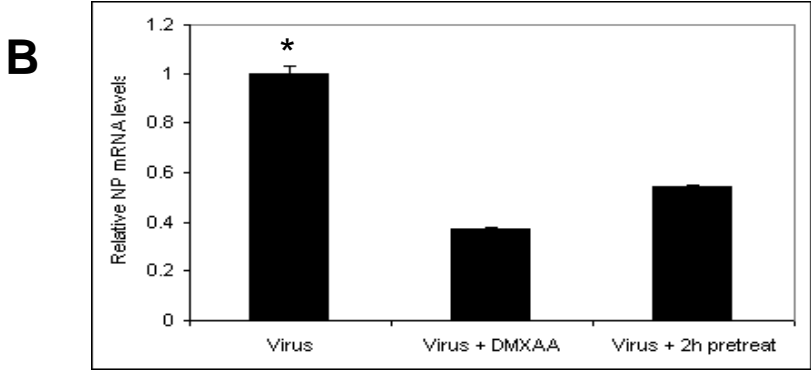

**Figure S2**

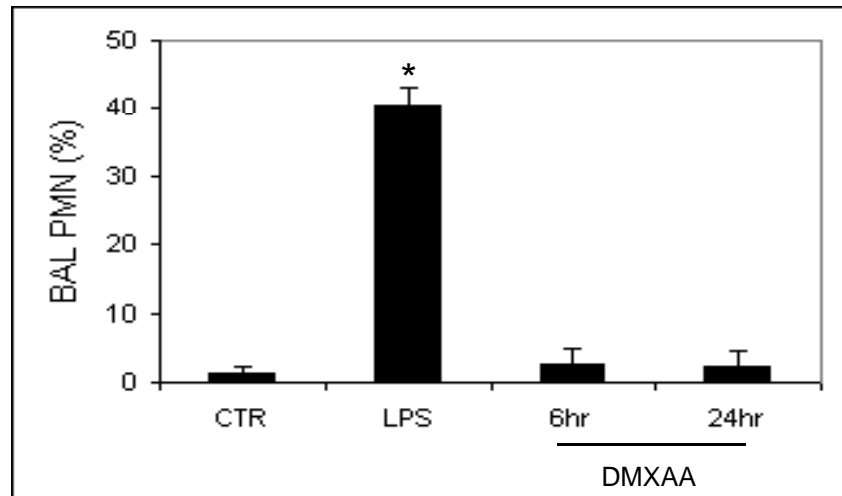

# Figure S3

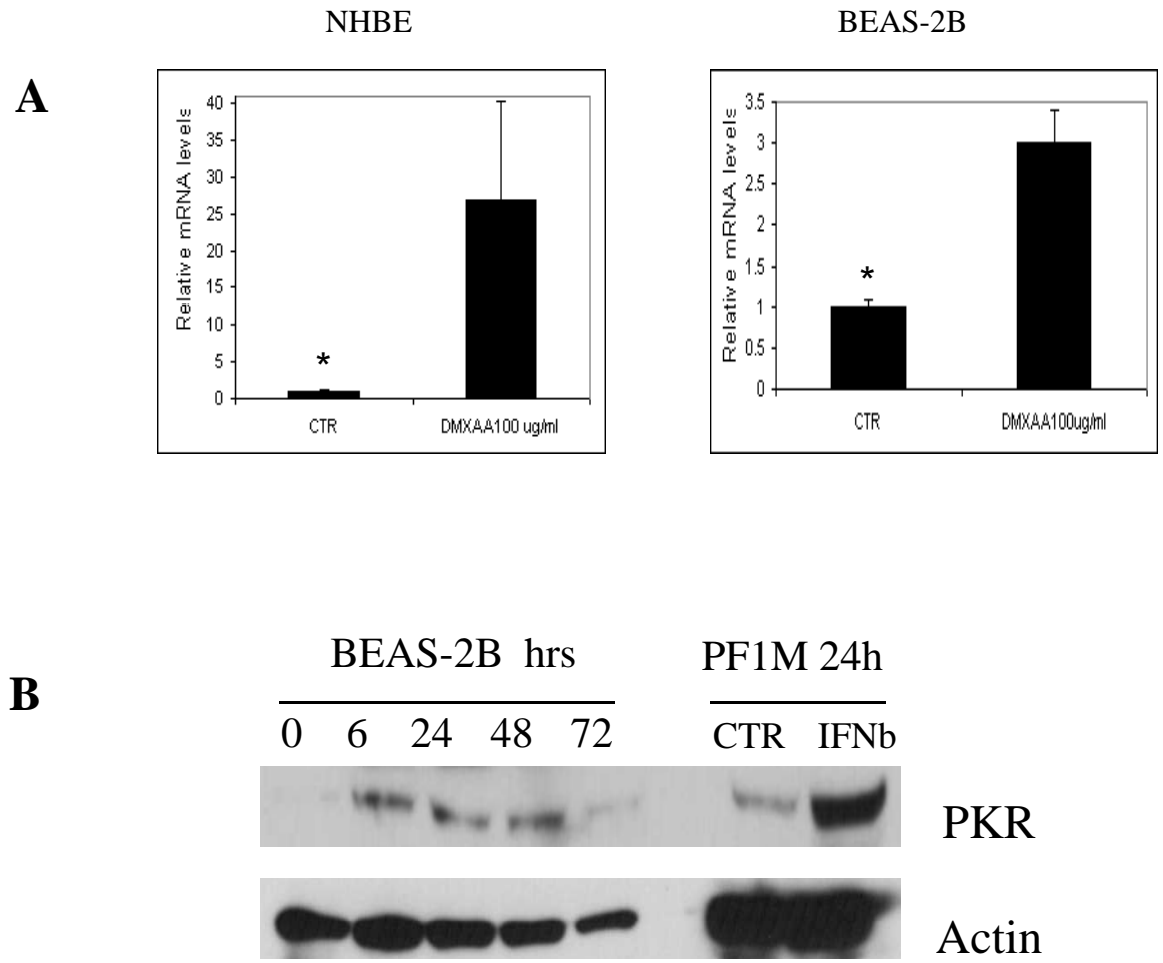

# Table S1

|        |      | Control       | LPS               | DMXAA 6h       | DMXAA 24h     |
|--------|------|---------------|-------------------|----------------|---------------|
| BALF   | KC   | 27.1+/-8.8    | 336.5+/-110.8*    | undetectable   | 18.8+/-6.5    |
|        | MIP2 | 175.9+/-123.9 | 1157.9+/-163.4*   | 41.9+/-22.1    | 61.3+/-16.5   |
|        | IP10 | 400.6+/-71.6  | 238.1+/-37.3      | 123.1+/-4.1    | 273.1+/-28    |
|        | MCP1 | undetectable  | 1.7+/-2.4         | 27.2+/-14.7    | 2.7+/-1.3     |
|        | IL6  | 20.1+/-17.2   | 272.1+/-153.9     | 18.8+/-9.8     | 161.8+/-87.4  |
| Plasma | KC   | 21.4+/-4.6    | 20.5+/-15.9       | 21.4+/-8.2     | 101.7+/-18.6* |
|        | MIP2 | 468.7+/-167.4 | 12445.3+/-1312.7* | 1362+/-1008.6  | 3752+/-588.6* |
|        | IP10 | 102.9+/-39.2  | 65.4+/-27.9       | 52.9+/-30.2    | 202.9+/-131.0 |
|        | MCP1 | undetectable  | 59+/-24.7         | 340.7+/-136.9* | 90.7+/-1.4*   |
|        | IL6  | 33.5+/-6.1    | 495+/-68.5*       | 41.9+/-31.2    | 173.1+/-8.8*  |
